# Supplementary material for: Destructive quantum interference in meta-oligo(phenyleneethynylene) molecular wires with gold–graphene heterojunctions
Source: Royal Society of Chemistry journal article supplement (doi:10.1039/d3nr04012g), 2023-11-20
Supplement: d3nr04012g1.pdf [file d3nr04012g1.pdf]

# Supporting information

## 1. Organic synthesis

### 1.1 General experimental details

All starting materials and reagents used for synthesis are purchased from Aladdin or Macklin or J&K company and used directly. All products were characterised by  $^1\text{H}$  and  $^{13}\text{C}$  NMR spectroscopy using a Bruker spectrometer. Chemical shifts are reported in parts per million (ppm). The chemical shifts of THF- $d_8$  is 3.58 ppm and 1.72 ppm in  $^1\text{H}$  spectra and 67.21 ppm and 25.31 ppm in  $^{13}\text{C}$  spectra. The chemical shifts of  $\text{CD}_3\text{OD}$  is 3.31 ppm in  $^1\text{H}$  spectra and 49.00 ppm in  $^{13}\text{C}$  spectra. The synthesis of MN, PS, MS, 9 and 11 and was prepared according to the published procedure.<sup>1</sup> The synthesis of 5 were prepared according to the published procedure.<sup>2</sup>

### 1.2 Synthesis of 1, 3-Bis (4-aminophenylethynyl) benzene

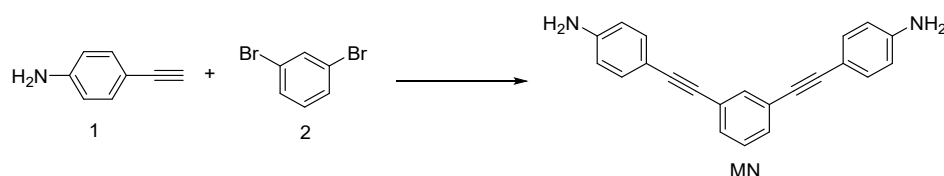

$\text{PdCl}_2(\text{PPh}_3)_2$  (84.8 mg, 0.12 mmol),  $\text{CuI}$  (18.0 mg, 0.01 mmol), THF (12 mL), and 1,3-dibromobenzene **2** (0.24 mL, 2.0 mmol) were placed in round bottom flask under argon. Then, the solution of 4-ethynylaniline **1** (0.562 g, 4.8 mmol), 0.5 mM aqueous ethanolamine (12 mL) and THF (5 mL) was added in to mixture. The mixture was heated at 60 °C for 26 h. The reaction mixture was cooled to room temperature and diluted with water and EtOAc, filtered under vacuum. The filtrate was extracted with ethyl acetate and washed with water and brine. The organic layer was dried over  $\text{Na}_2\text{SO}_4$  and evaporated to dryness. The residue was purified by column chromatography (silica gel, dichloromethane/hexane) to afford pale yellow solid.

$^1\text{H-NMR}$  (400 MHz, THF- $d_8$ ):  $\delta$  7.51 (m, 1H), 7.38 (d,  $J$ = 2.76 Hz, 2H), 7.33 (t,  $J$ = 4.4 Hz, 1H), 7.26 (d,  $J$ = 8.6 Hz, 4H), 6.68 (d,  $J$ = 8.6 Hz, 4H), 4.9 (m, 4H).

$^{13}\text{C-NMR}$  (100 Hz, THF- $d_8$ ):  $\delta$  148.67, 133.00, 132.41, 129.75, 128.22, 124.47,

114.29, 110.83, 90.71, 85.50.

### 1.3 The synthesis of 1-methylthio-4-[2-(trimethylsilyl) ethynyl] benzene (**5**)

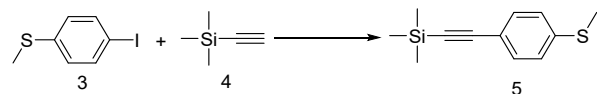

4-iodoanisole **3** (5.00 mL, 20 mmol), PdCl<sub>2</sub>(PPh<sub>3</sub>)<sub>2</sub> (0.42 g, 0.6 mmol) and CuI (0.14 g, 0.5 mmol) were dissolved in THF (20 mL). After stirring for one hour, the solution of trimethylsilylacetylene **4** (4.15 ml, 30 mmol), diisopropylamine (6 mL) and THF (10mL) were added to mixture and stirred overnight. Next, diluted the reaction mixture with water and ethyl acetate. The mixture was filtered and extract with ethyl acetate. Then the upper organic layer was washed with water and brine. The solution was dried over with Mg<sub>2</sub>SO<sub>4</sub> and then evaporated to dryness. The residue was purified by column chromatography (silica gel, hexane) to afford pale yellow oil.

<sup>1</sup>H-NMR (400 MHz, CD<sub>3</sub>OD): δ 7.39 (d, J= 8.5 Hz, 2H), 7.17 (d, J= 8.6 Hz, 2H), 2.50 (s, 3H), 0.27 (s, 9H).

<sup>13</sup>C-NMR (100 Hz, CD<sub>3</sub>OD): δ 139.62, 132.25, 125.65, 119.38, 104.90, 94.17, 15.33, 0.02.

#### 1.1.1. The synthesis of 4-ethynylthioanisole (**6**)

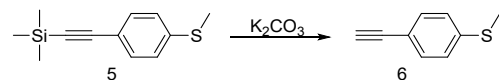

1-methylthio-4-[2-(trimethylsilyl) ethynyl] benzene **5** (1.23 g, 5.58 ml) and potassium carbonate (1.16 g, 8.37 mmol) were dissolved at THF (50 ml). The mixture was stirred for six hours. Then, diluted the mixture with water and extracted with EtOAc, wash with brine. The organic phase was dried over with Mg<sub>2</sub>SO<sub>4</sub> and evaporated to dryness. The product **4** was pale yellow liquid. (2.19 g, 100%)

<sup>1</sup>H-NMR (400 MHz, CD<sub>3</sub>OD): δ 7.39 (d, J= 8.6 Hz, 2H), 7.17 (d, J= 8.6 Hz, 2H), 3.07 (s, 1H), 2.48 (s, 3H).

<sup>13</sup>C-NMR (100 Hz, CD<sub>3</sub>OD): δ 140.07, 132.40, 125.73, 118.29, 83.46, 74.09, 15.16.

### 1.1.2. The synthesis of 1, 4-bis ((4-(methylthio) phenyl) ethynyl) benzene

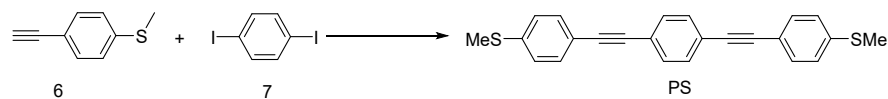

$\text{PdCl}_2(\text{PPh}_3)_2$  (0.084 g, 0.12 mmol),  $\text{CuI}$  (0.002 g, 0.01 mmol) and 1,4-diodobenzene **7** (0.66 g, 2 mmol) were dissolved in THF (20 mL). After stirring for one hour, the solution of 4-ethynylthioanisole **6** (0.65 g, 4.4 mmol), diisopropylamine (1.32 mL) and THF (10mL) were added and stirred overnight. Then diluted the reaction mixture with water and EtOAc. The mixture was filtered and extract with ethyl acetate. Then the upper organic layer was washed with water and brine. The solution was dried over with  $\text{Mg}_2\text{SO}_4$  and then evaporated to dryness. The residue was purified by column chromatography (silica gel, dichloromethane/hexane) to afford pale yellow solid.

$^1\text{H-NMR}$  (400 MHz,  $\text{THF-}d_8$ ):  $\delta$  7.47 (t,  $J=7.8$  Hz, 8H), 7.24 (d,  $J=7.8$  Hz, 4H), 2.53 (s, 6H).

$^{13}\text{C-NMR}$  (100 Hz,  $\text{THF-}d_8$ ):  $\delta$  143.25, 139.35, 137.54, 135.20, 131.91, 131.49, 128.30, 125.85, 14.17.

### 1.1.3. The synthesis of 1, 3-bis ((4-(methylthio) phenyl) ethynyl) benzene

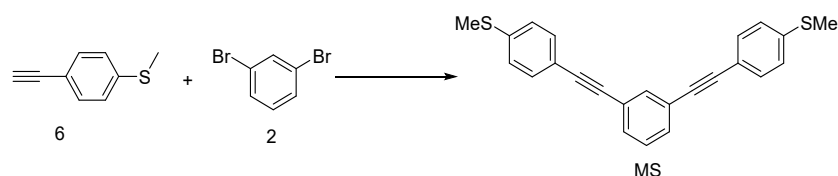

$\text{PdCl}_2(\text{PPh}_3)_2$  (0.098 g, 0.14 mmol),  $\text{CuI}$  (0.026 g, 0.14 mmol) and 1,3-dibromobenzene **2** (0.57 g, 2.4 mmol) were dissolved in THF (20 mL). After stirring for one hour, the solution of 4-ethynylthioanisole **6** (0.89 g, 6 mmol), diisopropylamine (1.68 mL), and THF (10mL) were added and stirred overnight. Then diluted the reaction mixture with water and EtOAc. The mixture was filtered and extract with ethyl acetate. Then the upper organic layer was washed with water and brine. The solution was dried over with  $\text{Mg}_2\text{SO}_4$  and then evaporated to dryness. The residue was purified by column chromatography (silica gel, dichloromethane/hexane) to afford pale yellow solid.

$^1\text{H-NMR}$  (400 MHz,  $\text{THF-}d_8$ ):  $\delta$  7.71 (s, 1H), 7.50 (s, 4H), 7.46 (d,  $J=7.7$  Hz, 2H), 7.35

(t,  $J = 7.6$  Hz, 1H), 7.24 (d,  $J = 8.3$  Hz, 4H), 2.53 (s, 6H).

$^{13}\text{C-NMR}$  (100 Hz,  $\text{THF-}d_6$ ):  $\delta$  139.63, 134.48, 131.93, 131.13, 128.48, 125.90, 123.68, 119.30, 89.91, 88.67, 15.39.

## 1.4 The synthesis of 1, 4-bis((4-((trimethylsilyl)ethynyl)phenyl)ethynyl)benzene

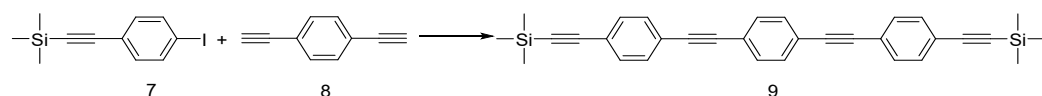

$\text{PdCl}_2(\text{PPh}_3)_2$  (0.18 g, 0.27 mmol),  $\text{CuI}$  (0.08 g, 0.27 mmol) and ((4-iodophenyl)ethynyl)trimethylsilane **7** (2 g, 2.2 mmol) were dissolved in THF (20 mL). After stirring for one hour, the solution of 1, 4-diethynylbenzene **8** (0.57 g, 4.5 mmol), diisopropylamine (2.8 mL), and THF (10 mL) were added and stirred overnight. Then diluted the reaction mixture with water and EtOAc. The mixture was filtered and extract with ethyl acetate. Then the upper organic layer was washed with water and brine. The solution was dried over with  $\text{Mg}_2\text{SO}_4$  and then evaporated to dryness. The residue was purified by column chromatography (silica gel, dichloromethane/hexane) to afford pale yellow solid.

$^1\text{H-NMR}$  (400 MHz,  $\text{THF-}d_6$ ):  $\delta$  7.52 (s, 4H), 7.48 (d,  $J = 8.5$  Hz, 4H), 7.43 (d,  $J = 8.3$  Hz, 4H), 0.23 (s, 18H).

$^{13}\text{C-NMR}$  (100 Hz,  $\text{THF-}d_6$ ):  $\delta$  133.69, 133.42, 133.25, 133.25, 125.30, 125.09, 106.48, 97.63, 92.63, 92.61, 0.99.

## 1.5 The synthesis of 1,4-bis((4-ethynylphenyl)ethynyl)benzene

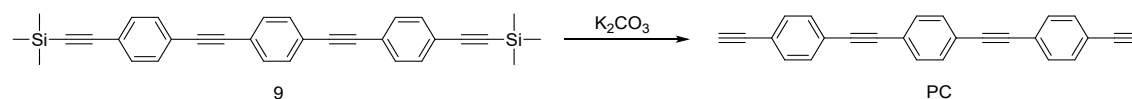

1, 4-bis((4-((trimethylsilyl)ethynyl)phenyl)ethynyl)benzene **9** (0.35 g, 0.74 mmol) and potassium carbonate (0.15 g, 1.12 mmol) were dissolved in THF (20 mL). The mixture was stirred for six hours. Then, diluted the mixture with water and extracted with EtOAc, wash with brine. The organic phase was dried over with  $\text{Mg}_2\text{SO}_4$  and evaporated to dryness. The product PC was pale yellow liquid. (0.24 g, 100%)

$^1\text{H-NMR}$  (400 MHz,  $\text{THF-}d_8$ ):  $\delta$  7.53 (s, 4H), 7.50 (d,  $J = 8.6$  Hz, 4H), 7.46 (d,  $J = 8.4$  Hz, 4H) 3.70 (s, 2H).

## 1.6 The synthesis of 1, 3-bis ((4((trimethylsilyl) ethynyl) phenyl) ethynyl) benzene

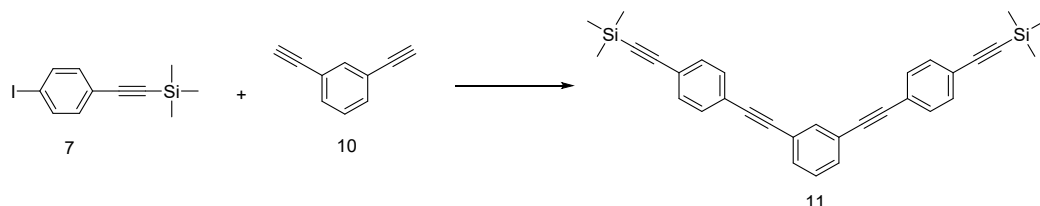

$\text{PdCl}_2(\text{PPh}_3)_2$  (0.18 g, 0.27 mmol),  $\text{CuI}$  (0.08 g, 0.27 mmol) and ((4-iodophenyl)ethynyl)trimethylsilane **7** (2 g, 2.2 mmol) were dissolved in THF (20 mL). After stirring for one hour, the solution of 1, 3-diethynylbenzene **10** (0.57 g, 4.5 mmol), diisopropylamine (2.8 mL), and THF (10mL) were added and stirred overnight. Then diluted the reaction mixture with water and EtOAc. The mixture was filtered and extract with ethyl acetate. Then the upper organic layer was washed with water and brine. The solution was dried over with  $\text{Mg}_2\text{SO}_4$  and then evaporated to dryness. The residue was purified by column chromatography (silica gel, dichloromethane/hexane) to afford pale yellow solid.

$^1\text{H-NMR}$  (400 MHz,  $\text{THF-}d_8$ ):  $\delta$  7.68 (s, 1H), 7.48 (m,  $J = 8.4$  Hz 6H), 7.42 (m,  $J = 5.2$  Hz, 4H), 7.38 (d,  $J = 7.7$  Hz, 1H), 0.23 (s, 18H).

$^{13}\text{C-NMR}$  (100 Hz,  $\text{THF-}d_8$ ):  $\delta$  136.20, 134.21, 133.69, 133.28, 130.67, 125.49, 125.31, 125.05, 106.47, 97.64, 91.99, 91.34, 0.89.

## 1.7 The synthesis of 1,3-bis((4-ethynylphenyl)ethynyl)benzene

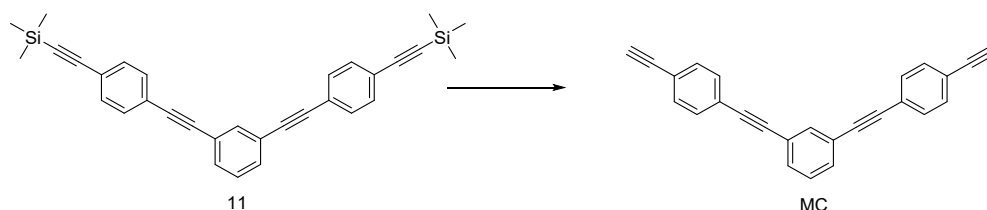

1, 3-bis((4-((trimethylsilyl)ethynyl)phenyl)ethynyl)benzene **11** (0.35 g, 0.74 ml) and potassium carbonate (0.15 g, 1.12 mmol) were dissolved at THF (20 ml). The mixture was stirred for six hours. Then, diluted the mixture with water and extracted with EtOAc, wash with brine. The organic phase was dried over with  $\text{Mg}_2\text{SO}_4$  and evaporated to

dryness. The product PC was pale yellow liquid. (0.24 g, 100%)

<sup>1</sup>H-NMR (400 MHz, THF-*d*<sub>8</sub>): δ 7.70 (s, 1H), 7.50-7.46 (m, 8H), 7.39 (t, J=8.2Hz, 1H), 3.69 (s, 2H).

<sup>13</sup>C-NMR (100 Hz, THF-*d*<sub>8</sub>): δ 136.17, 133.79, 133.24, 133.21, 130.56, 125.37, 125.08, 124.61, 91.80, 91.13, 84.63, 81.82.

## 2. UV-vis of target molecules

Both liquid UV-vis and solid UV-vis spectra of target molecules were measured by using Agilent Cary 300 UV-VIS analyser. As shown in Figure S1, the liquid UV of PS in different solvent were studied. When THF was used as solvent, the characteristic peaks indicating the fine structure of benzene can be seen in the spectra. When the solvent is changed, the fine structure of benzene becomes less pronounced due to the polarity of the solvent. When mesitylene was applied as solvent, the fine structure of benzene was disappeared. The maximum absorption bands ( $\lambda_{max}$ ) of PS are small shift when different solvent used. It is worth noting that when mesitylene was used as a solvent, the value of  $\lambda_{max}$  is significantly shifted and negative absorption values are observed at wavelength less than 225nm. This is because mesitylene itself has a benzene ring structure and the interaction between it and the target molecule interferes the measurement result. Moreover, considering the solubility of the target molecules in the solvent, we finally chose DCM as the optimum solvent for studied the optical properties of other molecules.

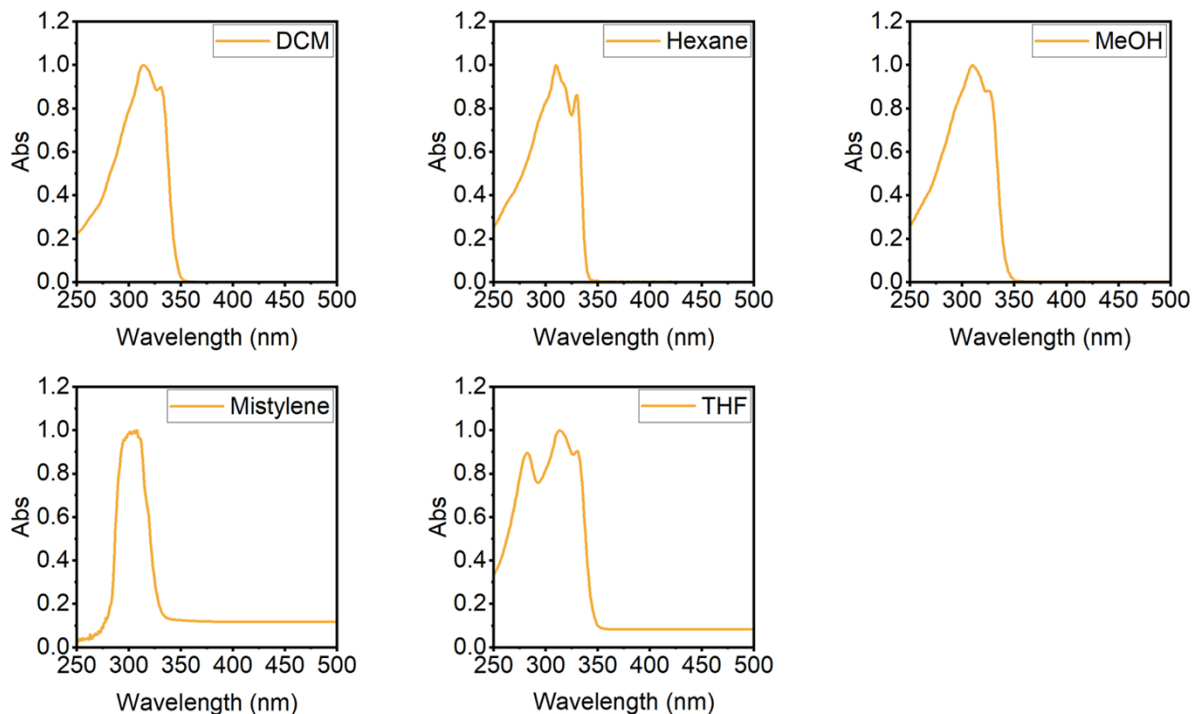

Figure S1 Liquid UV-vis spectra of PS in different solvent

The effect of concentration on  $\lambda_{max}$  was studied by measuring PS in DCM with 0.01mM, 0.02mM, 0.03mM, 0.04mM and 0.05mM concentration. Figure S2 a) and b) shows UV-vis spectra of PS before and after normalisation. It can be clearly seen that normalised spectra of PS with different concentration are overlapping and give the same  $\lambda_{max}$ . This means that the low concentration was not affect the liquid UV-vis results.

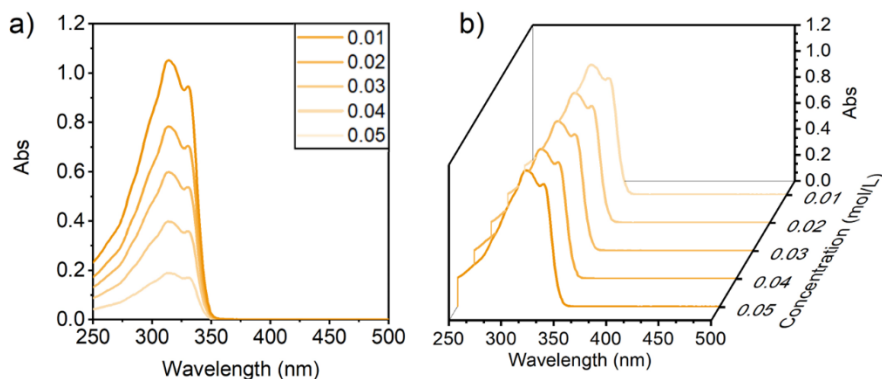

Figure S2 UV-vis spectra of PS before (a)) and after (b)) normalisation

### 3. 2D conductance-distance histogram

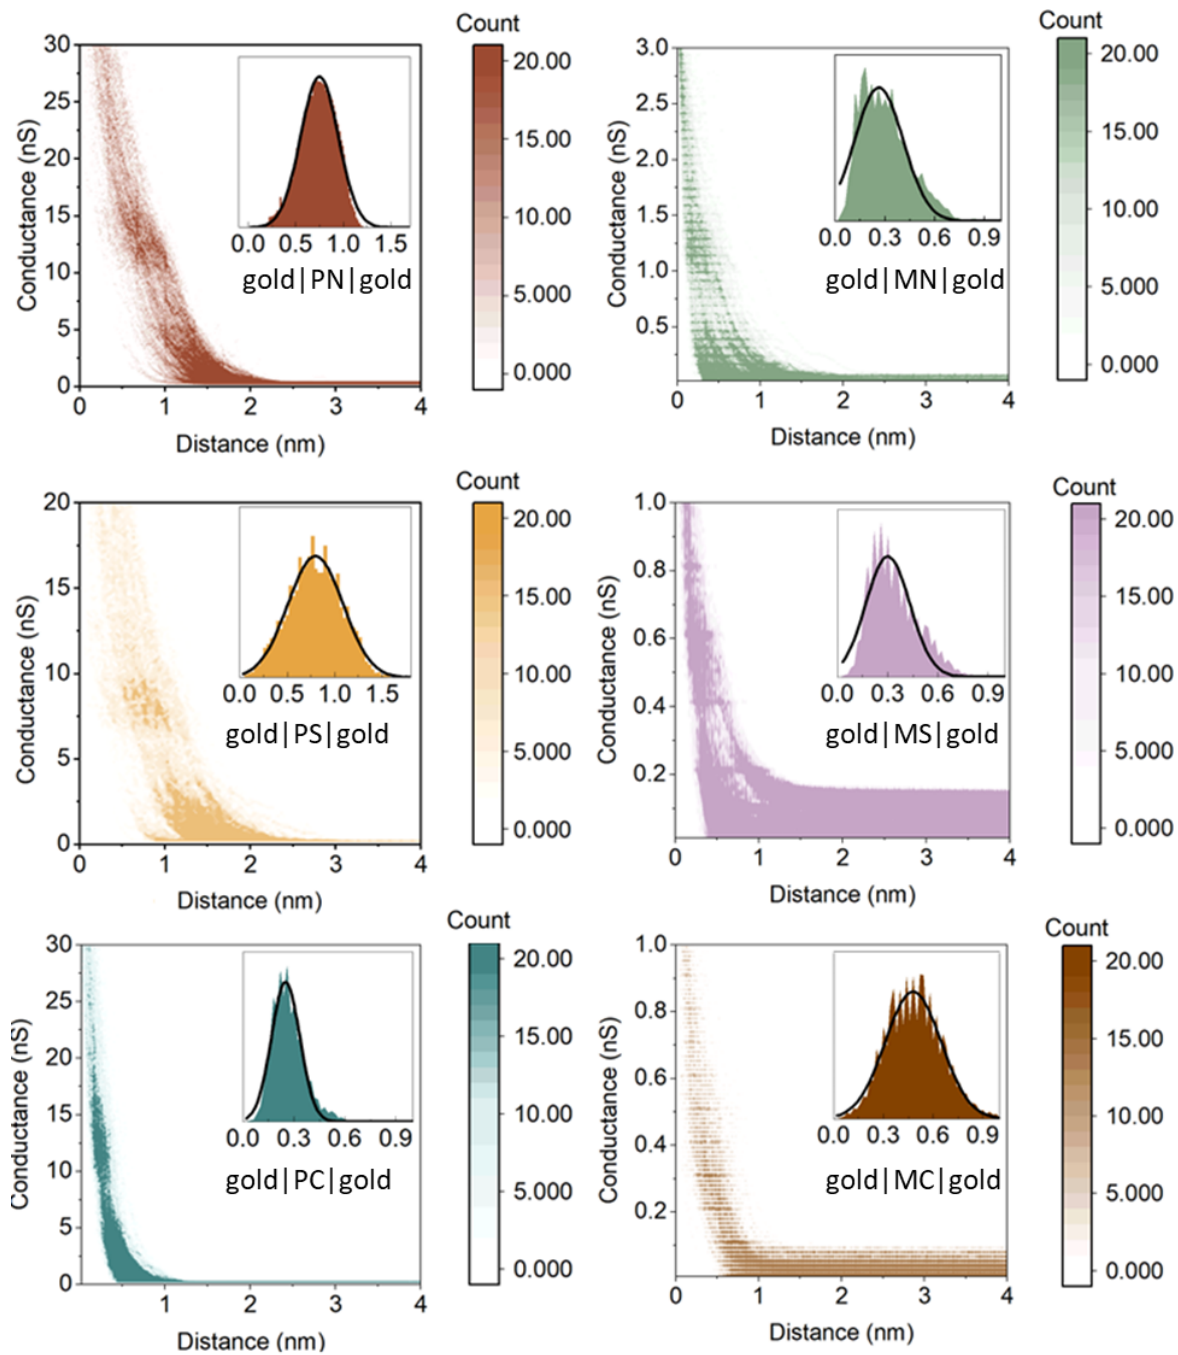

Figure S3 2D conductance-distance histogram of studied gold|molecule|gold molecular junctions. The insets are the Sw of corresponding molecular junctions.



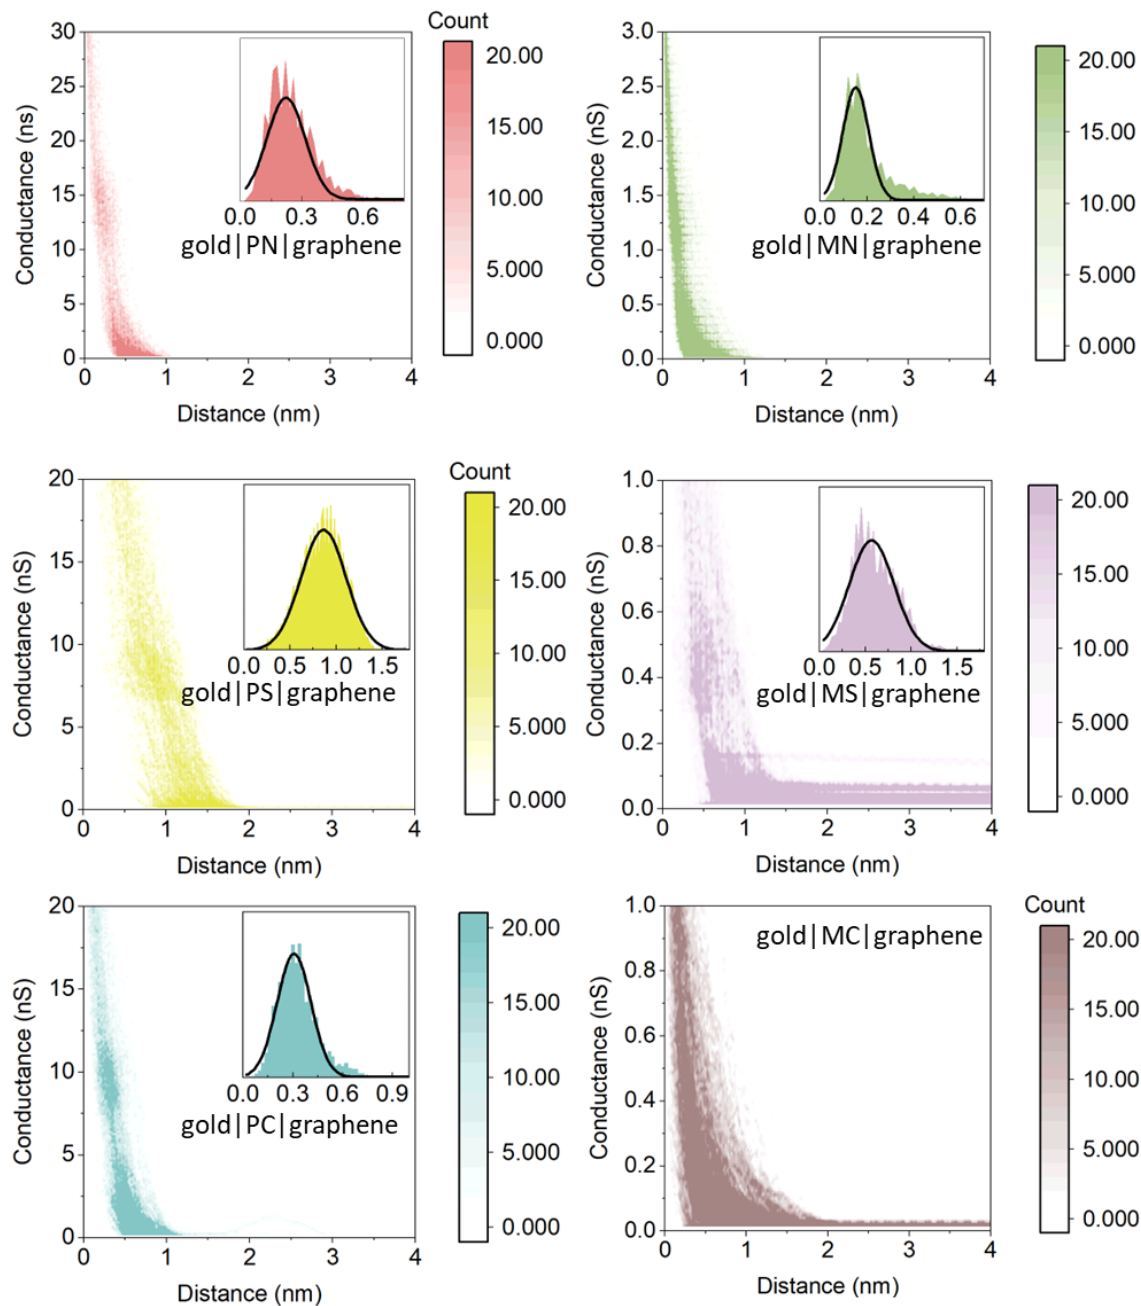

Figure S4 2D conductance-distance histogram of gold|molecule|graphene molecular Junctions. The insets are the Sw of corresponding molecular junctions.

#### 4. Break-off distance

The stretching distance of the entire molecular junction was described by break-off distance ( $S_{break-off}$ ). For STM- $I(s)$  technique, break-off distance consists of initial set point distance ( $S_0$ ) and plateau length  $S_w$ .<sup>3-6</sup> The  $S_0$  is determined by the displacement

distance between the point contact break and tip-substrate separation corresponding to the set point current ( $I_0$ ). The calculation details of  $S_0$  are described in detail in our previously published article.<sup>7</sup> The  $S_w$  is the end of the current plateau in  $I(s)$  curves.<sup>8</sup> The  $S_w$  is obtained by statistically analysing the distance corresponding to the molecular conductance range in the 2D conductance-displacement histogram. Table S1 summarises the  $S_0$ ,  $S_w$  and  $S_{break-off}$  of studied molecular junctions.

Table S1.  $S_0$ ,  $S_w$  and  $S_{break-off}$  of studied molecular junctions

| Molecules       | $S_0$ | $S_w$ | $S_{break-off}$ |
|-----------------|-------|-------|-----------------|
| Au/PN/Au        | 0.90  | 0.74  | 1.64            |
| Au/MN/Au        | 0.69  | 0.34  | 1.03            |
| Au/PS/Au        | 0.96  | 0.78  | 1.74            |
| Au/MS/Au        | 1.38  | 0.31  | 1.69            |
| Au/PC/Au        | 1.03  | 0.25  | 1.28            |
| Au/MC/Au        | 1.25  | 0.48  | 1.73            |
| Au/PN/graphene  | 0.80  | 0.22  | 1.02            |
| Au/MN/graphene  | 0.83  | 0.15  | 0.98            |
| Au/PS/graphene  | 0.90  | 0.85  | 1.75            |
| Au/MS/graphene  | 0.72  | 0.56  | 1.28            |
| Au/PC/graphene  | 0.77  | 0.30  | 1.07            |
| Au/MC/graphene* | -     | -     | -               |

## 5. Theoretical study of alkyne adsorption on graphene

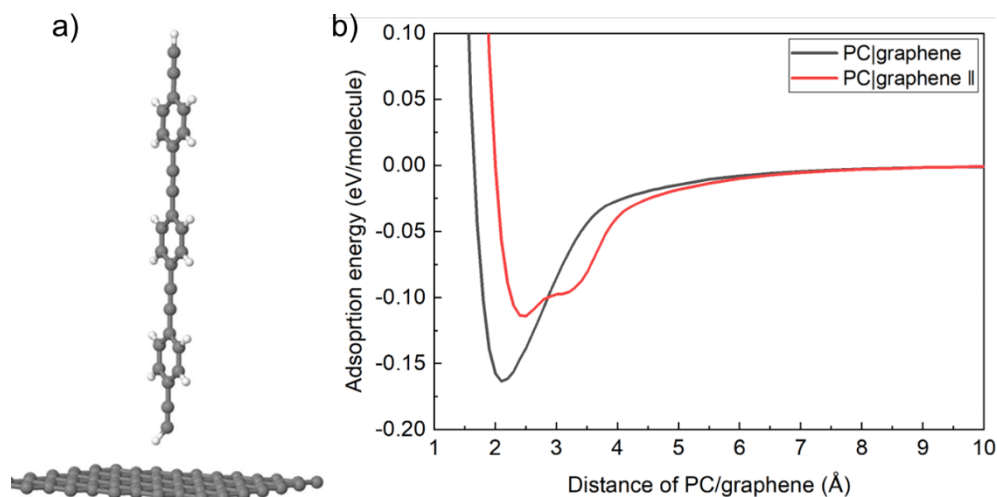

Figure S5 Structural model (a) and adsorption energy vs. distance curves (b) of PC/graphene substrate

## Reference

1. K. Sonogashira, Y. Tohda and N. Hagihara, *Tetrahedron Letters*, 1975, **16**, 4467-4470.
2. P. J. A. Joseph, S. Priyadarshini, M. L. Kantam and B. Sreedhar, *Tetrahedron*, 2013, **69**, 8276-8283.
3. S. Martin, W. Haiss, S. Higgins, P. Cea, M. C. Lopez and R. J. Nichols, *Journal of Physical Chemistry C*, 2007, **112**, 3941-3948.
4. W. Haiss, R. J. Nichols, H. van Zalinge, S. J. Higgins, D. Bethell and D. J. Schiffrin, *Physical Chemistry Chemical Physics*, 2004, **6**, 4330.
5. W. Haiss, C. Wang, I. Grace, A. S. Batsanov, D. J. Schiffrin, S. J. Higgins, M. R. Bryce, C. J. Lambert and R. J. Nichols, *Nat Mater*, 2006, **5**, 995-1002.
6. W. Haiss, H. van Zalinge, S. J. Higgins, D. Bethell, H. H?benreich, D. J. Schiffrin and R. J. Nichols, *Journal of the American Chemical Society*, 2003, **125**, 15294-15295.
7. Y. Fan, S. Pitie, C. Liu, C. Zhao, C. Zhao, M. Seydou, Y. J. Dappe, R. J. Nichols and L. Yang, *The Journal of Physical Chemistry C*, 2022, **126**, 3635-3645.
8. R. J. Nichols and S. J. Higgins, *Annu Rev Anal Chem (Palo Alto Calif)*, 2015, **8**, 389-417.
